1 **Evolution of sex hormone binding globulins reveals early**  
2 **gene duplication at the root of vertebrates.**

3 Yann Guiguen<sup>1</sup>, Jeremy Pasquier<sup>1</sup>, Alexis Fostier<sup>1</sup>, Julien Bobe<sup>1\*</sup>

4

5 <sup>1</sup> INRAE, LPGP, 35000 Rennes, France

6 Correspondence to: Julien Bobe, [julien.bobe@inrae.fr](mailto:julien.bobe@inrae.fr)

7

8 **Highlights:**

9

- 10 • Phylogeny, synteny and expression analyses shed new light on Shbg evolution in  
11 vertebrates.  
12 • Shbg diversity originates from a duplication event at the root of vertebrate evolution.  
13 • This duplication was followed by many independent losses of *Shbg* paralogs in  
14 vertebrates.  
15 • *Shbg* paralogs have acquired different tissue expression patterns.  
16

## 17 **Abstract**

18 Sex hormone-binding globulin (Shbg) is an important vertebrate blood carrier protein  
19 synthesized in the liver and involved in the transport and local regulation of sex steroids in  
20 target tissues. A novel *shbg* gene (*shbgb*) with a predominant ovarian expression was  
21 recently characterized. Being initially found only in salmonids, this *shbgb* was originally  
22 thought to result from the Salmonid-specific whole genome duplication. Using updated  
23 transcriptomic and genomic resources we identified *Shbgb* orthologs in non-salmonid  
24 teleosts (European eel, arowana), holosteans (spotted gar, bowfin), polypteriformes  
25 (reedfish), agnatha (sea lamprey) and in amphibians, and found that the classical *Shbg* gene  
26 (*Shbga*) displays a predominant hepatic expression whereas *Shbgb* has a predominant  
27 gonadal expression. Together, these results indicate that these two *Shbg* genes most likely  
28 originate from a whole genome duplication event at the root of vertebrate evolution, followed  
29 by numerous and independent losses and by tissue expression specialization of *Shbga* and  
30 *Shbgb* paralogs.

31

32 **Keywords:** evolution, Sex hormone-binding globulin, teleosts, vertebrates, gene expression

33

## 34 **1 Introduction**

35 Sex hormone-binding globulin (Shbg) is mainly known as a blood-protein carrier involved in  
36 the transport of sex steroids in the plasma and in the regulation of their bioavailability to  
37 target organs. Shbg proteins present sequence similarities with the other LamG domain-  
38 containing proteins growth arrest-specific 6 (Gas6) and protein S alpha (Pros1) (Joseph,  
39 1997; Joseph and Baker, 1992). By transporting and regulating androgens and estrogens  
40 access to the gonads, Shbg plays important roles in vertebrates reproduction (Hammond,  
41 2011). The Shbg protein was originally identified in the beta-globulin fraction of the human  
42 serum (Rosner et al., 1969) and has previously been known as Androgen-binding protein

43 (Abp). *Shbg* genes and Shbg proteins have been characterized in a variety of tetrapod  
44 species with the notable exception of birds (Westphal, 1986; Wingfield et al., 1984). In  
45 aquatic vertebrates, Shbg was originally found in the plasma of an elasmobranch, the skate  
46 (*Raja radiata*) (Freeman and Idler, 1969), and of a teleost, the rainbow trout (*Oncorhynchus*  
47 *mykiss*) (Fostier and Breton, 1975). Since that moment on, Shbg have been subsequently  
48 identified and studied in many fish species (see for review (Bobe et al., 2010)). Two different  
49 *shbg* genes i.e., *shbga* and *shbgb*, have been characterized in teleosts with *shbga* being the  
50 ortholog of the mammalian *Shbg*, which has been conserved from chondrichthyes to  
51 tetrapods and *shbgb* that has only been reported up to now in salmonids. In contrast to  
52 *shbga* that is mainly expressed in the liver (Bobe et al., 2008), the *shbgb* transcript was  
53 mainly found in the ovary, suggesting a local mediation of the sex steroids effects by the  
54 Shbgb protein (Bobe et al., 2008). These two salmonid Shbg proteins share very low identity  
55 percentages, with for instance 26% identity between Shbga and Shgbb at the amino acid  
56 level in the rainbow trout (Bobe et al., 2010, 2008). In comparison to other vertebrates and  
57 teleost fishes, the salmonid ancestor has experienced an additional (4R) whole genome  
58 duplication known as the salmonid specific whole genome duplication, or SaGD (Berthelot et  
59 al., 2014). For this reason, and because no *shbgb* gene had ever been reported in a non-  
60 salmonid species, it was first hypothesized that *shbga* and *shbgb* were ohnologous genes  
61 resulting from the SaGD (Bobe et al., 2008). This hypothesis was subsequently challenged in  
62 another study and the possibility of an ancient duplication followed by a lineage-specific  
63 retention in salmonids was suggested (Miguel-Queralt et al., 2009).

64 The evolutionary history of *Shbg* genes in vertebrates thus remained unclear and deserved  
65 further investigations. Using the increasing amount of genomic and transcriptomic data  
66 available for many vertebrate species we revisited the evolutionary history of *Shbg* genes.  
67 The transcriptomes of 24 actinopterygian species (including 22 teleosts) and vertebrate  
68 genomes were included in the analysis, which led to the identification of previously non-  
69 characterized *Shbgb* genes in several non-salmonid vertebrate lineages. Using  
70 phylogenomic analyses, we identified several *Shbgb* orthologs in a variety of non-salmonid

71 vertebrate species, including teleosts, non-teleost actinopterygians, amphibians and one  
72 agnatha. Combined with synteny reconstruction analysis, we demonstrated that *Shbg*  
73 diversity results from a duplication event much older than the SaGD. To gain new information  
74 on the functional evolution of *shbg* genes, we also used quantitative PCR and next  
75 generation sequencing approaches, to characterize the expression profiles of *shbga* and  
76 *shbgb* transcripts for several actinopterygian species. This showed that the paralogous *shbg*  
77 genes have acquired different expression profiles with *shbgb* having a predominant gonadal  
78 expression contrasting with a predominant liver expression of *shbga*.

## 79 **2 Material and Methods**

### 80 **2.1 Genomic and transcriptomic databases**

81 The genomes of the following species, human, *Homo sapiens*; tropical clawed frog, *Xenopus*  
82 *tropicalis*; coelacanth, *Latimeria chalumnae*; spotted gar, *Lepisosteus oculatus* and zebrafish,  
83 *Danio rerio* were explored using the Ensembl genome browser  
84 (<http://www.ensembl.org/index.html>). The rainbow trout (*Oncorhynchus mykiss*) genomic  
85 database was searched using the Genoscope trout genome browser  
86 (<http://www.genoscope.cns.fr/trout/>). The European eel (*Anguilla Anguilla*) genomic database  
87 was investigated using the European eel assembly available at ZF-Genomics  
88 (<http://www.zfgenomics.org/sub/eel>). Transcriptomes of holostean and teleostean species  
89 were investigated using the PhyloFish project resource (Pasquier et al., 2016) available at  
90 <http://phylofish.sigenae.org>. The protein sequences of Human SHBG, *Xenopus* Shbg,  
91 zebrafish Shbg, and rainbow trout Shbga and Shbgb were used as queries to identify  
92 homologs of Shbga and Shbgb in the different genomic and transcriptomic databases  
93 investigated. A similar methodology was used for Gas6 and Pros1 proteins that were  
94 relevant to study due to their phylogenetical proximity and structural similarity.

## 95 2.2 Phylogenetic and synteny analyses

96 Amino-acid sequences of 126 predicted Shbg (a, b), Gas6 and Pros1 proteins were first  
97 aligned using ClustalW (Thompson et al., 1994), then alignments were manually adjusted, to  
98 improve the quality of the multiple sequence alignments. The JTT (Jones, Taylor and  
99 Thornton) protein substitution matrix of the resulting alignment was determined using  
100 ProtTest software (Darriba et al., 2011). Phylogenetic analysis of the proteins presenting  
101 LamG domains (*i.e.* Shbga, Shbgb, Gas6 and Pros1) was performed using the neighbour  
102 joining (NJM) method (MEGA 5.1 software), with 1000 bootstrap replicates (Tamura et al.,  
103 2011). Trees were edited online with iTOL (Letunic and Bork, 2016) and exported as  
104 Scalable Vector Graphics.

105 Synteny maps of the conserved genomic regions in human, *Xenopus*, coelacanth, spotted  
106 gar and zebrafish were constructed based on information available within the Genomicus  
107 (Muffato et al., 2010) v75.01 website (<http://www.genomicus.biologie.ens.fr/genomicus-75.01/cgi-bin/search.pl>). Synteny map of the conserved genomic regions in the rainbow trout  
109 was performed using the Rainbow Trout Genomicus Server  
110 (<http://www.genomicus.biologie.ens.fr/genomicus-trout-01.01/cgi-bin/search.pl>). The synteny  
111 analyses of European eel conserved genomic regions were obtained performing TBLASTN  
112 searches in the corresponding genomic database. For each studied gene, the protein  
113 sequences of human and zebrafish were used as queries.

114 Multiple alignments plots of *shbgb* genes in salmonids were processed online  
115 (<http://genome.lbl.gov/vista/>) with mVISTA (Dubchak and Ryaboy, 2006; Poliakov et al.,  
116 2014) using genomic *shbgb* sequences of rainbow trout, *Oncorhynchus mykiss*, Atlantic  
117 salmon, *Salmon salar*, and Coho salmon, *Oncorhynchus kisutch*. Putative *shbgb*  
118 pseudogenes were retrieved by TBLASTN searches on whole genome sequences using as  
119 query the protein sequence of rainbow trout Shbgb.

120

### 121 **2.3 RNA-seq *shbg* and *shbg* tissue expression in holosteans and teleosts.**

122 RNA-seq and *de novo* assembly were performed for all studied species as previously  
123 described (Berthelot et al., 2014; Braasch et al., 2016; Pasquier et al., 2016). In order to  
124 study the expression patterns and levels of *shbg* transcripts for each actinopterygian species  
125 with two *shbg* genes, we mapped RNA-seq reads on the corresponding *shbg* coding  
126 sequence (CDS) using BWA-Bowtie (Langmead and Salzberg, 2012) with stringent mapping  
127 parameters (maximum number of allowed mismatches –aln 2). Mapped reads were counted  
128 using SAMtools (Li et al., 2009) idxstat command, with a minimum alignment quality value (–  
129 q 30) to discard ambiguous mapping reads. For each species, the numbers of mapped reads  
130 were then normalized for each *shbg* gene across the eleven tissues using the reads per kilo  
131 base per million mapped reads (RPKM) normalization. All RNA-seq data are available here:  
132 (<http://phylofish.sigenae.org/index.html>)

133

### 134 **2.4 Quantitative PCR analysis (QPCR).**

135 QPCR was performed using the RNA collections of the PhyloFish RNA-seq project as  
136 previously described (Braasch et al., 2016; Pasquier et al., 2016). Briefly, tissues were  
137 sampled from the same female individual and testis from a male individual, when possible. In  
138 some species and depending on the tissues, RNA samples from different individuals were  
139 pooled to obtain sufficient amounts of RNA. Total RNA was extracted using Tri-Reagent  
140 (Molecular Research Center, Cincinnati, OH, USA) according to the manufacturer's  
141 instructions. Reverse transcription (RT) was performed using 1 µg of RNA for each sample  
142 with M-MLV reverse transcriptase and random hexamers (Promega, Madison, WI, USA).  
143 Briefly, RNA and dNTPs were denatured for 6 min at 70°C, chilled on ice for 5 min before the  
144 RT master mix was added. RT was performed at 37°C for 1 h and 15 min followed by a 15-  
145 min incubation step at 70°C. Control reactions were run without reverse transcriptase and  
146 used as negative control in the real-time PCR study. Quantitative RT-PCR (QPCR)  
147 experiments were performed using an Applied Biosystems StepOne Plus. RT products,

148 including control reactions, were diluted to 1/25, and 4  $\mu$ l were used for each PCR. All QPCR  
149 were performed in triplicates. QPCR was performed using a real-time PCR kit provided with  
150 a Fast-SYBR Green fluorophore (Applied Biosystems) with 200 nM of each primer in order to  
151 keep PCR efficiency between 80% and 100% for all target *shbg* genes. The relative  
152 abundance of target cDNA within a sample set was calculated from serially diluted cDNA  
153 pool (standard curve) using Applied Biosystem StepOne V.2.0 software. After amplification, a  
154 fusion curve was obtained to validate the amplification of a single PCR product. The fusion  
155 curves obtained showed that each primer pair used was specific of a single *shbg* transcript.  
156 The negative control reactions were used to estimate background level. Genes were  
157 considered significantly expressed when measured level was significantly above background  
158 at  $p < 0.05$  and within the range of the standard curve. For each studied tissue, cDNA  
159 originating from three individual fish were pooled and subsequently used for real-time PCR.  
160 Before further analysis, real-time PCR data were collected using the same detection  
161 threshold for all studied genes. Data were subsequently normalized using the  $\Delta\Delta C_t$  method  
162 to 18S transcript abundance in samples diluted to 1:2,000.

163

## 164 **2.5 Clustering analysis**

165 Expression profiles originating from either QPCR and RNA-seq were represented using  
166 supervised clustering methods (Eisen et al., 1998). Hierarchical clustering was processed  
167 using centroid linkage clustering, that uses the average value of all points in a cluster as a  
168 reference to calculate distance of other points, with Pearson's uncentered correlation as  
169 similarity metric on data that were normalized and median-centered using the Cluster  
170 program (Eisen et al., 1998). Results (colorized matrix) of hierarchical clustering analyses  
171 were visualized using the Java TreeView program (Saldanha, 2004).

172

## 173 **3 Results**

### 174 **3.1 Shbg gene evolution in vertebrates**

175 In order to decipher phylogenetic relationships among Shbg sequences, a phylogenetic  
176 reconstruction of the evolution of Shbg was made based using the alignment of 126  
177 vertebrate LamG domain-containing proteins. This phylogeny includes Shbg proteins, growth  
178 arrest specific 6 proteins (Gas6) and Vitamin K-dependent protein S (Pros1) and the tree  
179 was rooted using as outgroup the zebrafish Laminin subunit alpha 4 (lama4). This analysis  
180 (Fig. 1) shows that these vertebrate LamG domains proteins cluster into two major clades  
181 containing Shbg proteins on one side and the Gas6 and Pros1 proteins on the other side.  
182 These Shbg and Gas6/Pros1 clades are both significantly supported with high bootstrap  
183 values (*i.e.* 75% and 100%, respectively). The Shbg clade contains two sub-clades both  
184 supported by significant bootstrap values. The Shbga cluster (100% bootstrap support), in  
185 red, contains all classical vertebrate Shbg proteins from chondrichthyes to teleosts with the  
186 notable exception of birds in which no Shbg proteins have been detected (see also Fig.S2).  
187 The Shbgb cluster (93% bootstrap support), in blue, contains not only the salmonid Shbgb  
188 proteins, but also other vertebrate sequences outside the salmonid family including  
189 sequences from teleosts (European eel and silver arowana), non-teleost bony fishes  
190 (reedfish, spotted gar and bowfin), some amphibians and an agnatha, *i.e.*, the sea lamprey  
191 (Fig.1 and Fig.S1). The tree topology indicates that Shbgb proteins are not specific to the  
192 salmonids lineage and thus suggests a much more ancient origin of *Shbgb* genes in  
193 vertebrates than previously hypothesized (Bobe et al., 2008).

194 To strengthen this phylogeny-based analysis of Shbg protein evolutionary history we carried  
195 out a synteny analysis in order to better support this hypothesis of an ancient origin *Shbga*  
196 and *Shbgb* genes. The synteny analysis first revealed that these two *Shbg* genes are located  
197 on two different syntenic chromosome regions in vertebrates (see Fig. 2A for the *Shbga*  
198 locus and Fig. 2B for the *Shbgb* locus). In contrast, *Gas6* and *Pros1* genes are located on  
199 the same syntenic chromosome region in most studied species, with the exception of



200 primates (Fig. 2C). In vertebrates, *Shbga*, *Shbgb*, and *Gas6/Pros1* are also located in  
201 regions containing other syntenic gene families. These neighboring genes are spread over  
202 four syntenic regions (Fig. 2A-2D) like for instance for the *Atp*-related genes (*Atp1b2*,  
203 *Atp1b3*, *Atp4b*) that are found in all four syntenic chromosome regions. In addition, *Zbtb*-  
204 related genes (*Ztb4*, *Zbt38*, *Zbt33*) and *Lamp*-related genes (*Lamp1*, *Lamp2*, *Lamp3*) are  
205 present in three of the four different syntenic chromosome regions depending of the gene  
206 family. Altogether, these results strongly suggest that the diversity of the gene family present  
207 on these four syntenic chromosome regions probably results from early whole genome  
208 duplication events (VG1 and/or VG2) that occurred at the root of vertebrate evolution with a  
209 subsequent complex pattern of gene retention and gene losses.

210 Using the recently released salmonid genome resources, we also re-investigated the  
211 presence of additional copies of *shbg* genes in salmonids and confirmed that *shbga* and  
212 *shbgb* were both retained as single copies (Fig. 1) in rainbow trout, Atlantic salmon and coho  
213 salmon suggesting that no functional duplicated copies were retained after the salmonid  
214 whole genome duplication (SaGD). However, we also found an additional *shbgb* gene  
215 conserved in these three salmonid species (Fig.3A), but with many stop codons in its  
216 deduced open reading frame (see example for rainbow trout in Fig.3B), suggesting that this  
217 gene ( $\psi$  *shbgb*) was subsequently pseudogenized after the SaGD.

218

### 219 **3.2 Expression patterns of *shbga* and *shbgb***

220 In all investigated actinopterygians, *shbga* was found to be mainly expressed in the liver,  
221 supporting a conserved role for this blood-secreted Shbg (Fig.4). However, in the silver  
222 arowana a low *shbga* expression in the gonads is also detected in addition to the  
223 predominant liver expression (Fig.4A and Fig.4B). In contrast to *shbga*, expression of *shbgb*  
224 is not predominant in the liver in all investigated actinopterygians (Fig.4A and Fig.4B). In  
225 contrast, *shbgb* expression is predominantly detected in the gonads (ovary and/or testis) with  
226 the notable exception of the European eel.

## 227 4 Discussion

228 In this study, we aimed at investigating the diversity of the *Shbg* family in vertebrates and the  
229 evolutionary history of *Shbg* genes. To date, despite the recent discovery of a second *shbg*  
230 gene (i.e. *shbgb*) in salmonids, the origin and diversity of *Shbg* genes in vertebrates has  
231 remained controversial. Because salmonids experienced an additional whole genome  
232 duplication (SaGD) approximately 100 Mya (Berthelot et al., 2014; Macqueen and Johnston,  
233 2014) compared to other teleost fish and as *shbgb* genes were initially found in salmonids  
234 and, never reported at that time in any non-salmonid species, *shbga* and *shbgb* have been  
235 first hypothesized to be the result of the SaGD (Bobe et al., 2010, 2008). However pairwise  
236 comparison of *Shbga* and *Shbgb* reveals a surprisingly low sequence identity (around 25% at  
237 the amino acid level) that was initially interpreted as *Shbga* and *Shbgb* being highly divergent  
238 SaGD paralog. However, this paralogy relationship was not supported by the phylogeny  
239 reconstruction (Bobe et al., 2008) and this discrepancy was thus explained as being the  
240 result of a long-branch attraction artifact resulting from the dramatic divergence of these two  
241 sequences (Bobe et al., 2010, 2008). Based on the cloning of another salmonid *shbgb* gene  
242 in coho salmon, *Oncorhynchus kisutch* and the low sequence identity between salmonids  
243 *Shbga* and *Shbgb*, other authors (Miguel-Queralt et al., 2009), hypothesized that the *shbgb*  
244 gene could stem from a much more ancient duplication than the SaGD. In order to  
245 decipher the evolutionary history of *Shbg* genes we re-analyzed the phylogenetic  
246 relationships of *Shbg* genes, their local synteny context, and the evolution of the  
247 phylogenetically and structurally closely related genes i.e., *Gas6* and *Pros1* that also contain  
248 LamG domains and are often identified as potential members of the same family. The  
249 identification of new *Shbgb* genes in vertebrates, the *Shbg* phylogenetic tree topology and  
250 their local synteny relationships strongly suggest that *Shbga* and *Shbgb* genes result from a  
251 whole genome duplication event that occurred very early at the root on the vertebrate  
252 lineage. The presence of a single *Shbga* gene and a single *Shbgb* gene in amphibians,  
253 holosteans, polypteriformes, agnatha and some teleost fishes, suggests that this *Shbg*

254 duplication stems at least from the second round of vertebrate genome duplication (VG2). It  
255 is however also possible that *Shbga* and *Shbgb* originate the first round of vertebrate  
256 genome duplication (VG1) followed by the loss of one duplicate of each gene before VG2.  
257 Following this early duplication, these two *Shgb* paralogs have evolved through many  
258 different phylum-specific gene retentions and/or gene losses. Among them the case of birds  
259 is interesting as they not only lost their *Shbgb* gene like reported here for many other  
260 tetrapods, but also their *Shbga* gene that is found to be conserved in all other vertebrates.  
261 This complete absence of *Shbga* in birds has been already reported and it was hypothesized  
262 that this specific steroid hormone-binding transport would then be performed by a  
263 corticosteroid-binding globulin (Wingfield et al., 1984). Similarly, no *Shbg* homologs were  
264 detected by homology searches in Chondrichthyes (data not shown) but their complete  
265 absence in this clade requires further in-depth analysis and additional genome information as  
266 *Shbg*-like sex steroid binding capacities exist in the serum of the Thorny skate (Freeman and  
267 Idler, 1969). In tetrapods, *Shbgb* was only found in Amphibians along with *Shbga*. *Shbgb*  
268 was also found in holosteans (spotted gar and bowfin), polypteriformes (reedfish), agnatha  
269 (sea lamprey) and in a few teleost fish orders i.e., in Elopomorphs (European eel),  
270 Osteoglossiforms (silver arowana) and Salmoniforms even though the protein is frequently  
271 misannotated in GenBank (Fig.S1). Interestingly we did not find any retention of additional  
272 whole genome [SaGD and the teleost specific duplication (TGD)] paralogs for both *shbga*  
273 and *shbgb* gene with the exception of a pseudogenized SaGD *shbgb* paralog ( $\psi$  *shbgb*). This  
274 indicates that these extra whole genome duplications did no impact the repertoire of *shbg*  
275 genes with a maximum of one *shbga* and one *shbgb* functional copies in all investigated  
276 teleost clades. This systematic and independent losses of additional *shbga* and *shbgb*  
277 duplicated paralogs in teleosts may reflect an evolutionary constraint of maintaining a correct  
278 gene and protein dosage as it has been suggested in other organisms (Conant et al., 2014;  
279 Gout and Lynch, 2015).

280 In consistency with existing data in mammals, our expression data showed that *shbga* is  
281 predominantly expressed in the liver in the different teleost species studied here. This

282 confirms what has previously been reported in various teleost species including zebrafish  
283 (*Danio rerio*) (Miguel-Queralt et al., 2004), rainbow trout (*Oncorhynchus mykiss*) (Bobe et al.,  
284 2008), Coho salmon (*Oncorhynchus kisutch*) (Miguel-Queralt et al., 2009), pejerrey  
285 (*Odontesthes bonariensis*) (González et al., 2017) and sea bass (*Dicentrarchus labrax*)  
286 (Miguel-Queralt et al., 2007). In addition, this strong hepatic expression is also observed in  
287 spotted gar (*Lepisosteus oculatus*) and bowfin (*Amia calva*) as shown by both RNA-seq and  
288 QPCR data.

289 In contrast to *shbga*, data on the tissue distribution of *shbgb* remain scarce. The ovarian  
290 predominant expression of *shbgb* was originally reported in rainbow trout, in which the  
291 transcript could also be detected at lower levels in muscle and stomach (Bobe et al., 2008).  
292 Semi quantitative data in Coho salmon confirmed the expression of *shbgb* in the ovary and  
293 stomach and revealed its presence in gills (Miguel-Queralt et al., 2009). Here we show that  
294 *shbgb* is also predominant expressed in the ovary in brown trout, silver arowana and  
295 grayling. We also report a strong testicular expression of *shbgb* in the two holostean species,  
296 spotted gar and bowfin, that appears to be lost in teleosts. In addition, the *shbgb* gene does  
297 not exhibit any gonad predominant expression in European eel. Together, our data show that  
298 *shbga* and *shbgb* have a very specific expression patterns with a predominant expression in  
299 liver and gonads, respectively. This pattern appears to be conserved during evolution without  
300 any significant change following whole genome duplications events (TGD and SaGD), with  
301 the exception of European eel in which the gonad predominant expression of *shbgb* appears  
302 to be lost. Finally, the strong testicular expression of *shbgb* revealed in bowfin and spotted  
303 gar is not found in any teleost species suggesting a specific role of *Shbgb* in testicular  
304 physiology in holostean species.

305

306 The multiple independent losses of *Shbgb* across vertebrates, while *Shbga*, *Gas6* and *Pros1*  
307 have been conserved in almost all vertebrates, could reflect different adaptive and  
308 reproductive strategies as *Shbg* have been shown to be important carrier proteins for the  
309 blood transport of sex steroids and for their delivery to target reproductive tissues

310 (Hammond, 2011). However, despite this discrepancy among species, the distinct roles of  
311 Shgba in hormone transport in the blood and of Shbgb in local hormone action in  
312 reproductive organs as well as the associated expression in liver and gonads, respectively,  
313 appears to be evolutionary conserved in species that have retained both genes despite a few  
314 intriguing species-specific exceptions.

## 315 **5 Acknowledgement**

316 This work was supported by the French national research Agency (ANR-10-GENM-017–  
317 PhyloFish).

## 318 **6 References**

- 319 Berthelot, C., Brunet, F., Chalopin, D., Juanchich, A., Bernard, M., Noël, B., Bento, P., Da  
320 Silva, C., Labadie, K., Alberti, A., Aury, J.-M., Louis, A., Dehais, P., Bardou, P., Montfort, J.,  
321 Klopp, C., Cabau, C., Gaspin, C., Thorgaard, G.H., Boussaha, M., Quillet, E., Guyomard, R.,  
322 Galiana, D., Bobe, J., Volff, J.-N., Genêt, C., Wincker, P., Jaillon, O., Roest Crolius, H.,  
323 Guiguen, Y., 2014. The rainbow trout genome provides novel insights into evolution after  
324 whole-genome duplication in vertebrates. *Nat. Commun.* 5, 3657.  
325 <https://doi.org/10.1038/ncomms4657>
- 326 Bobe, J., Guiguen, Y., Fostier, A., 2010. Diversity and biological significance of sex hormone-  
327 binding globulin in fish, an evolutionary perspective. *Mol. Cell. Endocrinol.* 316, 66–78.
- 328 Bobe, J., Mahé, S., Nguyen, T., Rime, H., Vizziano, D., Fostier, A., Guiguen, Y., 2008. A  
329 novel, functional, and highly divergent sex hormone-binding globulin that may participate in  
330 the local control of ovarian functions in salmonids. *Endocrinology* 149, 2980–2989.  
331 <https://doi.org/10.1210/en.2007-1652>
- 332 Braasch, I., Gehrke, A.R., Smith, J.J., Kawasaki, K., Manousaki, T., Pasquier, J., Amores, A.,  
333 Desvignes, T., Batzel, P., Catchen, J., Berlin, A.M., Campbell, M.S., Barrell, D., Martin, K.J.,  
334 Mulley, J.F., Ravi, V., Lee, A.P., Nakamura, T., Chalopin, D., Fan, S., Wcisel, D., Cañestro,

335 C., Sydes, J., Beaudry, F.E.G., Sun, Y., Hertel, J., Beam, M.J., Fasold, M., Ishiyama, M.,  
336 Johnson, J., Kehr, S., Lara, M., Letaw, J.H., Litman, G.W., Litman, R.T., Mikami, M., Ota, T.,  
337 Saha, N.R., Williams, L., Stadler, P.F., Wang, H., Taylor, J.S., Fontenot, Q., Ferrara, A.,  
338 Searle, S.M.J., Aken, B., Yandell, M., Schneider, I., Yoder, J.A., Volff, J.-N., Meyer, A.,  
339 Amemiya, C.T., Venkatesh, B., Holland, P.W.H., Guiguen, Y., Bobe, J., Shubin, N.H., Di  
340 Palma, F., Alföldi, J., Lindblad-Toh, K., Postlethwait, J.H., 2016. The spotted gar genome  
341 illuminates vertebrate evolution and facilitates human-teleost comparisons. *Nat. Genet.* 48,  
342 427–437. <https://doi.org/10.1038/ng.3526>  
343 Conant, G.C., Birchler, J.A., Pires, J.C., 2014. Dosage, duplication, and diploidization:  
344 clarifying the interplay of multiple models for duplicate gene evolution over time. *Curr. Opin.*  
345 *Plant Biol.* 19, 91–98. <https://doi.org/10.1016/j.pbi.2014.05.008>  
346 Darriba, D., Taboada, G.L., Doallo, R., Posada, D., 2011. ProtTest 3: fast selection of best-fit  
347 models of protein evolution. *Bioinforma. Oxf. Engl.* 27, 1164–1165.  
348 <https://doi.org/10.1093/bioinformatics/btr088>  
349 Dubchak, I., Ryaboy, D.V., 2006. VISTA family of computational tools for comparative  
350 analysis of DNA sequences and whole genomes. *Methods Mol. Biol. Clifton NJ* 338, 69–89.  
351 <https://doi.org/10.1385/1-59745-097-9:69>  
352 Eisen, M.B., Spellman, P.T., Brown, P.O., Botstein, D., 1998. Cluster analysis and display of  
353 genome-wide expression patterns. *Proc. Natl. Acad. Sci. U. S. A.* 95, 14863–14868.  
354 Fostier, A., Breton, B., 1975. Binding of steroids by plasma of a teleost: the rainbow trout,  
355 *Salmo gairdneri*. *J Steroid Biochem.*  
356 Freeman, H.C., Idler, D.R., 1969. Sex hormone binding proteins. II. Isolation from serum of  
357 an elasmobranch (*Raja radiata*). *Gen. Comp. Endocrinol.* 13, 83–91.  
358 [https://doi.org/10.1016/0016-6480\(69\)90224-x](https://doi.org/10.1016/0016-6480(69)90224-x)  
359 González, A., Fernandino, J.I., Hammond, G.L., Somoza, G.M., 2017. Sex hormone binding  
360 globulin: Expression throughout early development and adult pejerrey fish, *Odontesthes*  
361 *bonariensis*. *Gen. Comp. Endocrinol.* 247, 205–214.  
362 <https://doi.org/10.1016/j.ygcen.2017.02.004>

- 363 Gout, J.-F., Lynch, M., 2015. Maintenance and Loss of Duplicated Genes by Dosage  
364 Subfunctionalization. *Mol. Biol. Evol.* 32, 2141–2148. <https://doi.org/10.1093/molbev/msv095>
- 365 Hammond, G.L., 2011. Diverse roles for sex hormone-binding globulin in reproduction. *Biol.*  
366 *Reprod.* 85, 431–441. <https://doi.org/10.1095/biolreprod.111.092593>
- 367 Joseph, D.R., 1997. Sequence and functional relationships between androgen-binding  
368 protein/sex hormone-binding globulin and its homologs protein S, Gas6, laminin, and agrin.  
369 *Steroids* 62, 578–588. [https://doi.org/10.1016/s0039-128x\(97\)00045-7](https://doi.org/10.1016/s0039-128x(97)00045-7)
- 370 Joseph, D.R., Baker, M.E., 1992. Sex hormone-binding globulin, androgen-binding protein,  
371 and vitamin K-dependent protein S are homologous to laminin A, merosin, and *Drosophila*  
372 crumbs protein. *FASEB J. Off. Publ. Fed. Am. Soc. Exp. Biol.* 6, 2477–2481.  
373 <https://doi.org/10.1096/fasebj.6.7.1532944>
- 374 Langmead, B., Salzberg, S.L., 2012. Fast gapped-read alignment with Bowtie 2. *Nat.*  
375 *Methods* 9, 357–359. <https://doi.org/10.1038/nmeth.1923>
- 376 Letunic, I., Bork, P., 2016. Interactive tree of life (iTOL) v3: an online tool for the display and  
377 annotation of phylogenetic and other trees. *Nucleic Acids Res.* 44, W242-245.  
378 <https://doi.org/10.1093/nar/gkw290>
- 379 Li, H., Handsaker, B., Wysoker, A., Fennell, T., Ruan, J., Homer, N., Marth, G., Abecasis, G.,  
380 Durbin, R., 1000 Genome Project Data Processing Subgroup, 2009. The Sequence  
381 Alignment/Map format and SAMtools. *Bioinformatics* 25, 2078–2079.  
382 <https://doi.org/10.1093/bioinformatics/btp352>
- 383 Macqueen, D.J., Johnston, I.A., 2014. A well-constrained estimate for the timing of the  
384 salmonid whole genome duplication reveals major decoupling from species diversification.  
385 *Proc. Biol. Sci.* 281, 20132881. <https://doi.org/10.1098/rspb.2013.2881>
- 386 Miguel-Queralt, S., Blázquez, M., Piferrer, F., Hammond, G.L., 2007. Sex hormone-binding  
387 globulin expression in sea bass (*Dicentrarchus labrax* L.) throughout development and the  
388 reproductive season. *Mol. Cell. Endocrinol.* 276, 55–62.  
389 <https://doi.org/10.1016/j.mce.2007.06.009>
- 390 Miguel-Queralt, S., Knowlton, M., Avvakumov, G.V., Al-Nouno, R., Kelly, G.M., Hammond,

391 G.L., 2004. Molecular and functional characterization of sex hormone binding globulin in  
392 zebrafish. *Endocrinology* 145, 5221–5230. <https://doi.org/10.1210/en.2004-0678>

393 Miguel-Queralt, S., Underhill, C., Devlin, R.H., Hammond, G.L., 2009a. Characterization and  
394 measurement of the plasma alpha- and beta-sex hormone-binding globulin paralogs in  
395 salmon. *Endocrinology* 150, 366–375. <https://doi.org/10.1210/en.2008-0964>

396 Miguel-Queralt, S., Underhill, C., Devlin, R.H., Hammond, G.L., 2009b. Characterization and  
397 Measurement of the Plasma  $\alpha$ - and  $\beta$ -Sex Hormone-Binding Globulin Paralogs in Salmon.  
398 *Endocrinology* 150, 366–375. <https://doi.org/10.1210/en.2008-0964>

399 Muffato, M., Louis, A., Poisnel, C.-E., Roest Crollius, H., 2010. Genomicus: a database and a  
400 browser to study gene synteny in modern and ancestral genomes. *Bioinforma. Oxf. Engl.* 26,  
401 1119–1121. <https://doi.org/10.1093/bioinformatics/btq079>

402 Pasquier, J., Cabau, C., Nguyen, T., Jouanno, E., Severac, D., Braasch, I., Journot, L.,  
403 Pontarotti, P., Klopp, C., Postlethwait, J.H., Guiguen, Y., Bobe, J., 2016. Gene evolution and  
404 gene expression after whole genome duplication in fish: the PhyloFish database. *BMC*  
405 *Genomics* 17, 368. <https://doi.org/10.1186/s12864-016-2709-z>

406 Poliakov, A., Foong, J., Brudno, M., Dubchak, I., 2014. GenomeVISTA--an integrated  
407 software package for whole-genome alignment and visualization. *Bioinforma. Oxf. Engl.* 30,  
408 2654–2655. <https://doi.org/10.1093/bioinformatics/btu355>

409 Rosner, W., Christy, N.P., Kelly, W.G., 1969. Partial purification and preliminary  
410 characterization of estrogen-binding globulins from human plasma. *Biochemistry* 8, 3100–  
411 3108.

412 Saldanha, A.J., 2004. Java Treeview--extensible visualization of microarray data. *Bioinforma.*  
413 *Oxf. Engl.* 20, 3246–3248. <https://doi.org/10.1093/bioinformatics/bth349>

414 Tamura, K., Peterson, D., Peterson, N., Stecher, G., Nei, M., Kumar, S., 2011. MEGA5:  
415 molecular evolutionary genetics analysis using maximum likelihood, evolutionary distance,  
416 and maximum parsimony methods. *Mol. Biol. Evol.* 28, 2731–2739.  
417 <https://doi.org/10.1093/molbev/msr121>

418 Thompson, J.D., Higgins, D.G., Gibson, T.J., 1994. CLUSTAL W: improving the sensitivity of



419 progressive multiple sequence alignment through sequence weighting, position-specific gap

420 penalties and weight matrix choice. *Nucleic Acids Res.* 22, 4673–4680.

421 Westphal, U., 1986. Steroid-protein interactions II. *Monogr. Endocrinol.* 27, 1–603.

422 Wingfield, J.C., Matt, K.S., Farner, D.S., 1984. Physiologic properties of steroid hormone-

423 binding proteins in avian blood. *Gen. Comp. Endocrinol.* 53, 281–292.

424 [https://doi.org/10.1016/0016-6480\(84\)90254-5](https://doi.org/10.1016/0016-6480(84)90254-5)

425

426

427

428

Figures

429

430

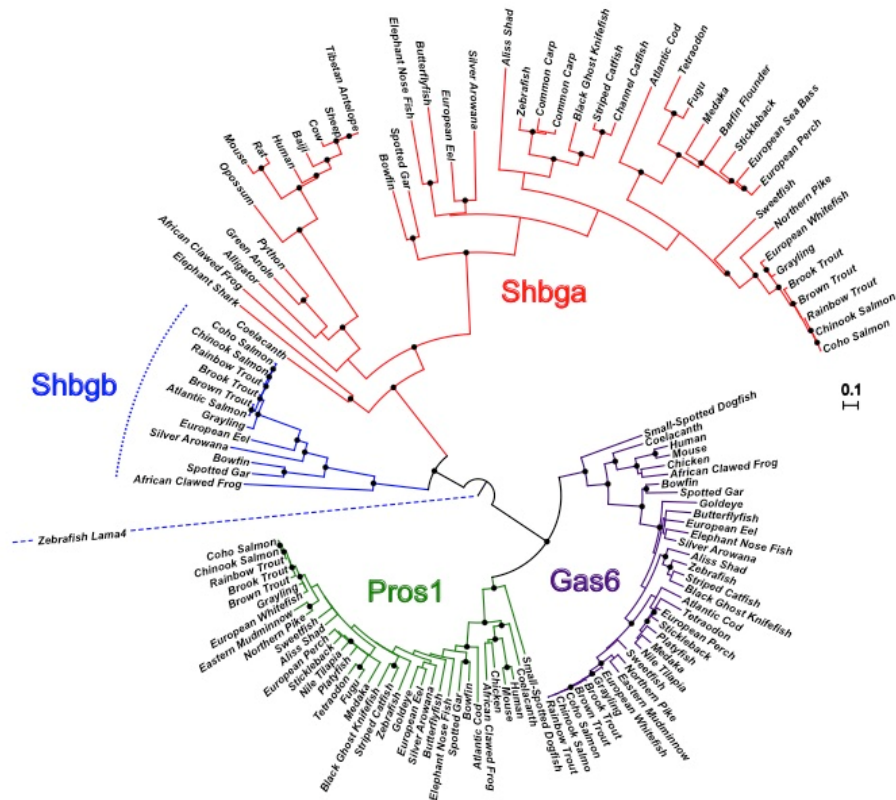

431

432

433 **Figure 1: Phylogenetic reconstruction of the evolution of LamG domains proteins**

434 **(Shbg, Gas6 and Pros1) in vertebrates.** Circular NJM phylogenetic tree of LamG domains

435 proteins including Shbga in red, Shbgb in blue, Gas6 in purple and Pros1 in green. The tree

436 is rooted using zebrafish Laminin Subunit Alpha 4 (lama4) and bootstrap values over 0.75

437 are shown with a black dot on each significant node.

438

439

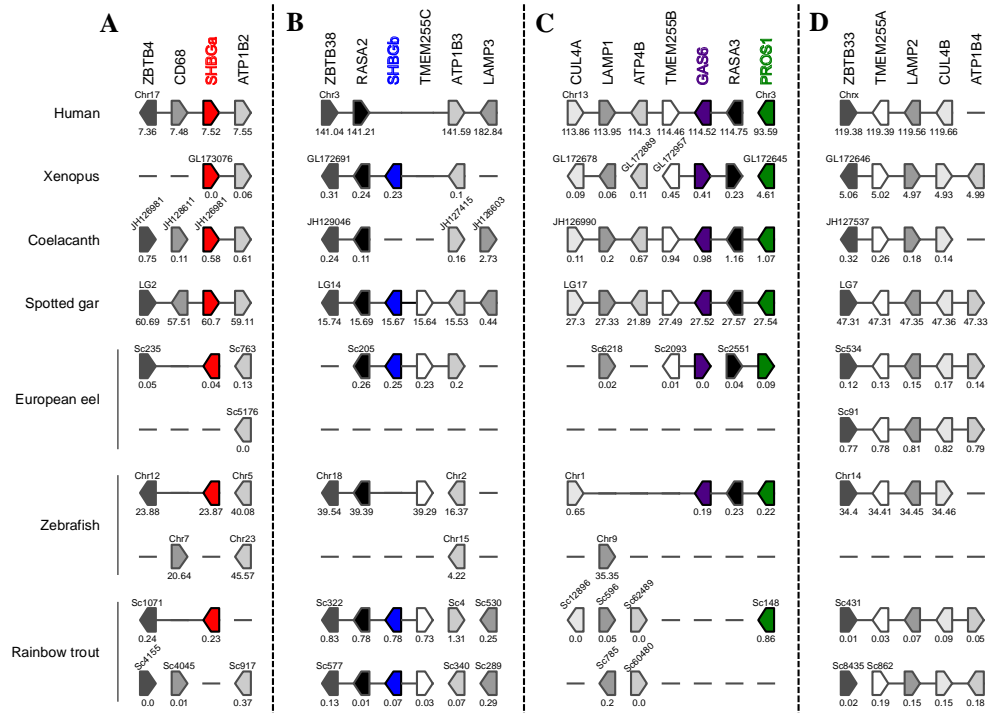

440

441 **Figure 2: Synteny maps of conserved genomic regions around LamG domains**  
 442 **proteins (i.e. Shbga, Shbgb, Gas6 and Pros1) in human, Xenopus, coelacanth, spotted**  
 443 **gar, European eel, zebrafish and rainbow trout.** Synteny maps are given for genomic  
 444 regions around *Shbga* (A), *Shbgb* (B), *Gas6* and *Pros1* locus (C) and for a fourth region  
 445 containing homologs of neighbouring *Shbga*, *Shbgb*, *Gas6* and *Pros1* genes (D). Genes are  
 446 represented by blocks with an arrowed side indicating the gene orientation on chromosomes,  
 447 linkage group or scaffolds. Gene location on chromosomes (Chr for Human and zebrafish),  
 448 Linkage group (LG for spotted gar) and scaffolds (Ensembl reference or scaffold number) is  
 449 given in Mb below each gene block. Genes belonging to the same Chr, LG or scaffolds are  
 450 linked by a solid line.  
 451

452

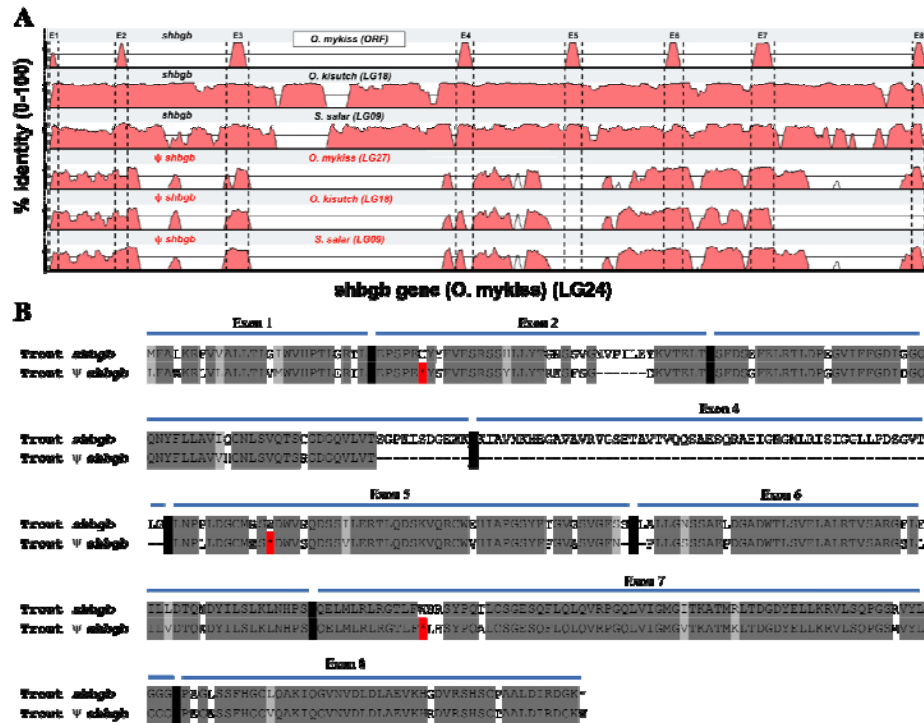

453

454 **Figure 3: Multiple alignments plots of *shbgb* genes in salmonids. (A).** Percentage of  
 455 sequence identity of *shbgb* genes in Atlantic salmon, *Salmon salar*, and Coho salmon,  
 456 *Oncorhynchus kisutch* compared to the rainbow trout, *Oncorhynchus mykiss*, *shbgb* gene on  
 457 linkage group (LG) 24. In addition to the functional *shbgb* genes that were found in all  
 458 salmonid species investigated, all these species have an additional *shbgb* homolog  
 459 containing multiple stop codons and thus considered as a pseudogene ( $\psi$  *shbgb*). (B).  
 460 Rainbow trout Shbgb and  $\psi$  Shbgb protein alignment showing that the  $\psi$  Shbgb contains  
 461 multiple stop codons (red asterisks) and a large deletion in exon 4 of the Shbgb protein.  
 462

463

464

465

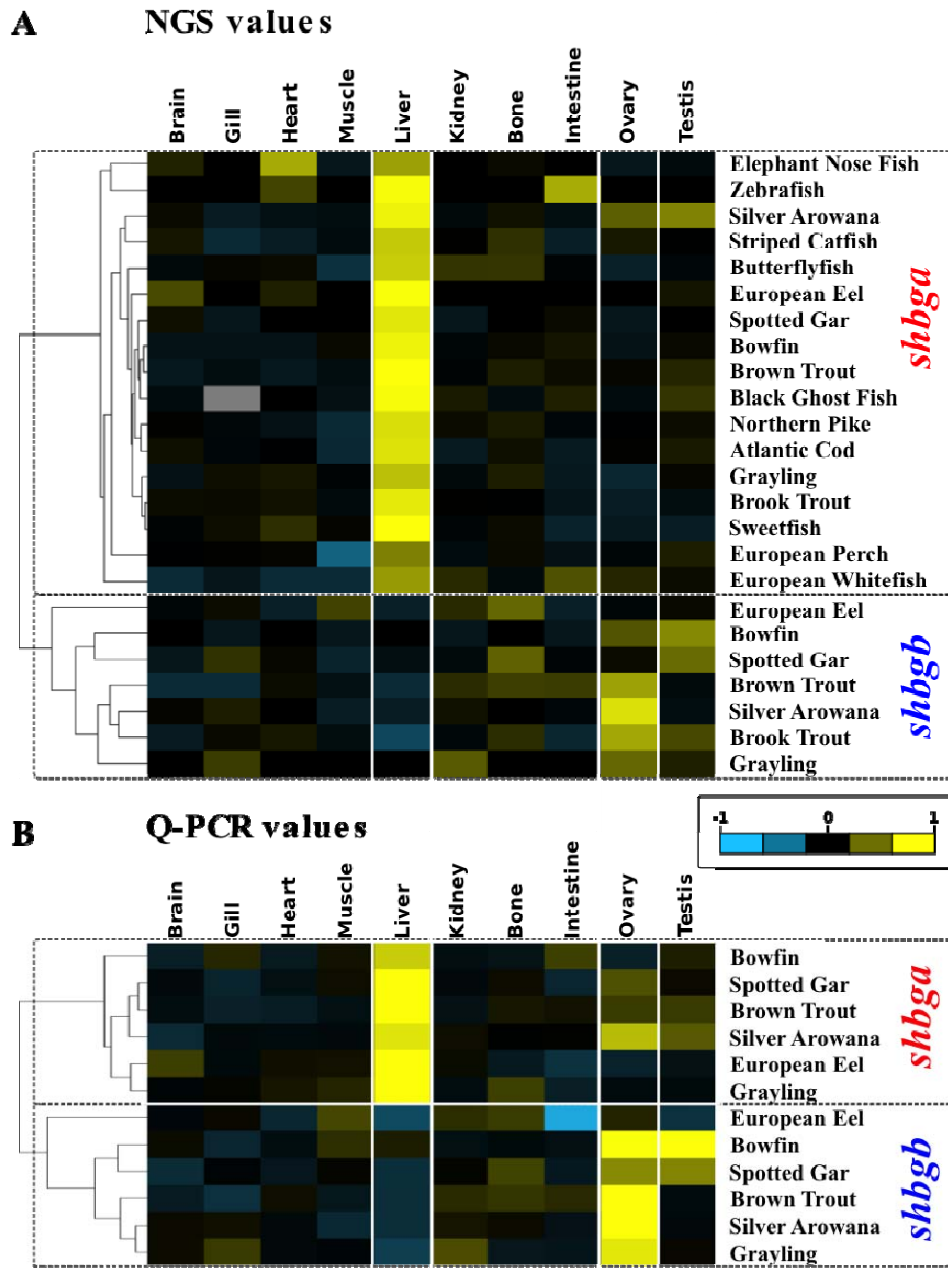

466

467 **Figure 4: Tissue expression profiles of *shbga* and *shbgb* genes.** (A). Heatmap  
 468 (colorized matrix) of the hierarchical clustering of tissue RNA-Seq expression profiles (NGS  
 469 values) of *shbg* genes in different Holostean (spotted gar and bowfin) and teleost species. A  
 470 predominant expression of *shbga* is found in the liver contrasting with the predominant  
 471 expression of *shbgb* in gonads (B). Heatmap (colorized matrix) of the hierarchical clustering  
 472 of tissue expression profiles of *shbg* genes analyzed by quantitative PCR (QPCR values) in  
 473 different Holostean (spotted gar and bowfin) and teleost species. Colorized matrixes highlight  
 474 the high expressing tissues in yellow, the low expressing tissues in blue and the median  
 475 expression in black (see color scale).  
 476

477

478

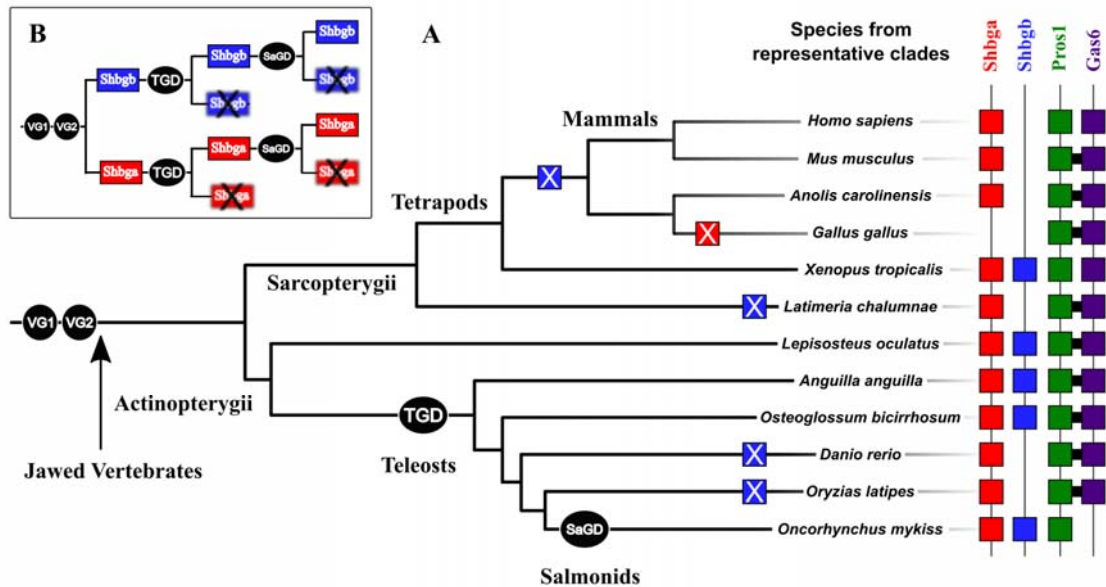

479

480 **Figure 5: Evolution of *Shbg/shbg*, *Gas6/gas6*, and *Pros1/pros1* genes through**  
 481 **successive whole genome duplications and independent gene losses. (A).** Schematic  
 482 representation of the evolution of LamG domains proteins including, *Shbga* (red squares),  
 483 *Shbgb* (blue squares), *Gas6* (purple squares) and *Pros1* (green squares) in some jawed  
 484 vertebrates' representative species. Whole genome duplications (black circles; VG1 and  
 485 VG2: vertebrate genome duplications 1 and 2, TGD: teleost genome duplication, SaGD:  
 486 salmonid genome duplication) are indicated at each duplication nodes. Gene losses are  
 487 represented by square boxes with a cross inside. (B). Simplified representation of the  
 488 evolution of *Shbg* proteins after whole genome duplications showing the systematic losses of  
 489 one *Shbga* and *Shbgb* paralog after each duplication.  
 490  
 491

492

## Supplementary Figures

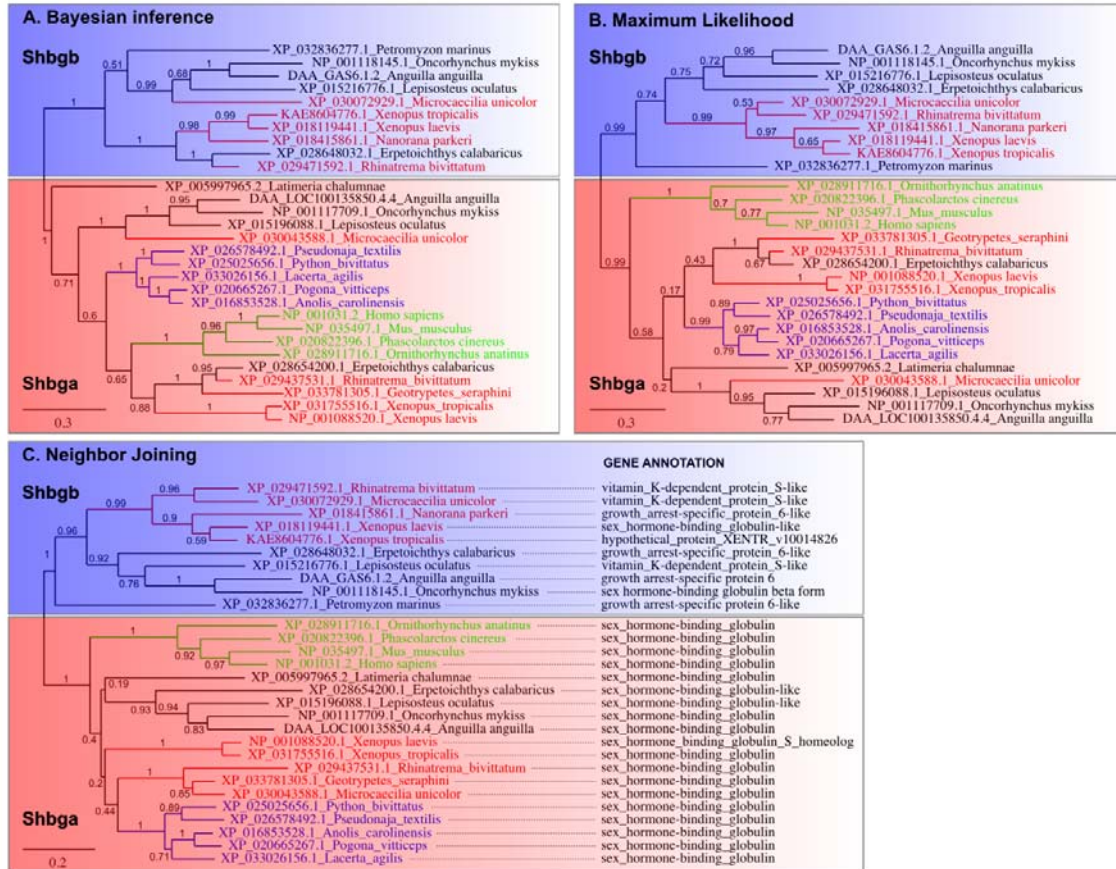

493

494 **Supplementary Figure 1: Phylogenetic trees of some vertebrate Shbga and Shbgb**  
495 **proteins.** Protein sequences were searched in the ref-seq GenBank database using blastp  
496 (protein-protein BLAST) and in the the PhyloFish website (<http://phylofish.sigenae.org/>) using  
497 Shbga and Shbgb proteins from spotted gar (*Lepisosteus oculatus*, XP\_015196088.1 and  
498 XP\_015216776.1) and Western claw frog (*Xenopus tropicalis*, XP\_0311755516.1 and  
499 KAE8604776.1) as baits. Phylogenetic analyses were performed on the Phylogeny.fr website  
500 (<http://www.phylogeny.fr>). Sequences were aligned with MUSCLE (v3.8.31) and cleaned with  
501 Gblocks (v0.91b) with default settings. Phylogenetic trees were reconstructed using the  
502 bayesian inference (A.) method implemented in the MrBayes program (v3.2.6), the maximum  
503 likelihood method (B.) implemented in the PhyML program (v3.1/3.0 aLRT) with 100  
504 bootstrap replicates, and the neighbor joining method (C.) implemented in the BioNJ  
505 program. All trees were reconstructed with default settings and the graphical representation  
506 and edition of the phylogenetic tree were performed with TreeDyn (v198.3). Proteins and tree  
507 branches are depicted in blue for reptiles red for amphibians and in green for mammals. In  
508 panel C., the GenBank annotations are given for all protein sequences (with the exception of  
509 Shbg protein in *Anguilla anguilla* that were retrieved from the PhyloFish website), showing  
510 that all Shbga proteins are well annotated but that most Shbgb proteins are mis-annotated as  
511 Pros1-like or Gas6-like proteins.  
512

513

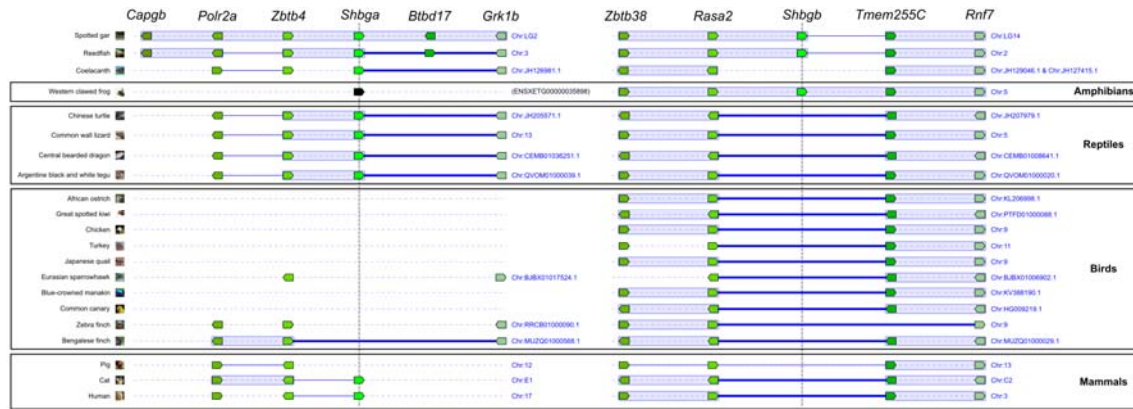

514

515 **Supplementary Figure 2: Genomic context and synteny relationships of some**  
516 **vertebrate *Shbga* and *Shbgb* proteins, showing the absence of both *Shbga* and *Shbgb***  
517 **in birds and of *Shbgb* only in mammals and reptiles.** This analysis was performed using  
518 the Genomicus genome browser (version 99.01,  
519 <https://www.genomicus.biologie.ens.fr/genomicus-99.01/>) using as seed sequences the  
520 accession numbers of *Shbga* (ENSLOCG00000013875) and *Shbgb*  
521 (ENSLOCG00000008107) of spotted gar (*Lepisosteus oculatus*). Only a subset of species is  
522 depicted in this figure but the absence of both *Shbga* and *Shbgb* in birds and of *Shbgb* only  
523 in mammals and reptiles was consistently found in all birds (N=35), mammals (N=99) and  
524 reptiles (N=14) genomes available in the Genomicus version 99.01. No *Shbgb* homolog were  
525 found in the elephant shark, hagfish and lamprey genomes available in this Genomicus  
526 version 99.01.  
527
